# Supplementary material
Source: publisher site journal article supplement (https://static.cambridge.org/content/id/urn:cambridge.org:id:article:S1443964619000329/resource/name/S1443964619000329supp001.docx)
Supplement: Supplementary file 1 [file S1443964619000329supp001.docx]

**Supplementary Material 1**

Description of PBS Provided to Participants During Survey

PBS is a behaviour management intervention that is individualised to each person’s social context. The therapist, in collaboration with the client’s natural supports (e.g., family members, friends, carers and work/school staff), tries to identify what is not working in the client’s everyday routines and why the client engages in challenging behaviours.

With a focus on the antecedents/triggers of the behaviours, changes are made in the client’s day-to-day life and the client is taught relevant skills to help them achieve personally meaningful goals. Such changes may include eliminating or avoiding triggers for challenging behaviours, providing the client with increased control over their daily routines, engagement in personally meaningful activities and social relationships, and teaching the client positive communication alternatives to their challenging behaviours.

The aim is to render the challenging behaviours unnecessary to the client and improve quality of life.
